# Supplementary material
Source: PubMed Central journal article supplement (PMC2615004)
Supplement: NIHMS85289-supplement-1.pdf [file NIHMS85289-supplement-1.pdf]

## SUPPORTING INFORMATION

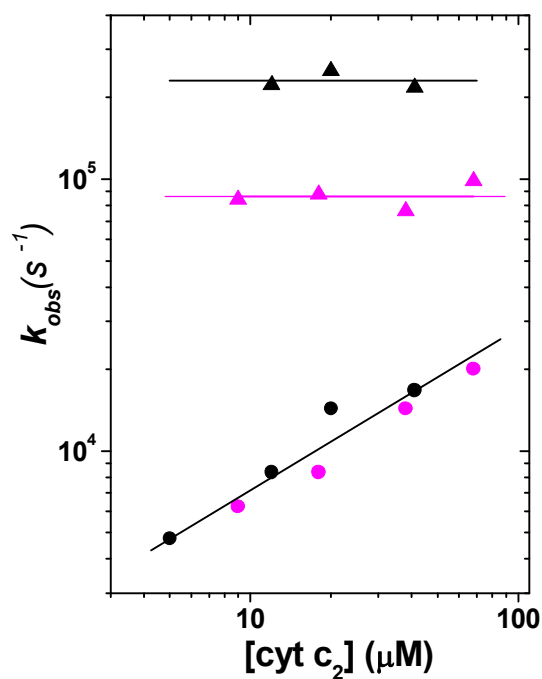

**Supplementary Figure S1** Biphasic electron transfer rates vs cyt  $c_2$  concentration for NA(M187) (black) and triple mutant (magenta) RCs. The fast rates (triangles) were independent of free cyt concentration and are assigned to the first order rate,  $k_e$ . Average values of  $k_e = 8.6 \times 10^4\ s^{-1}$  and  $2.3 \times 10^5\ s^{-1}$  were found for NA(M187) and triple mutant respectively. The slow rates (circles) are proportional to cyt concentration and represent a second order reaction. The RC concentration was  $\sim 3\ \mu M$ . (10 mM Hepes and 0.04%  $\beta$ -maltoside at pH 7.5)

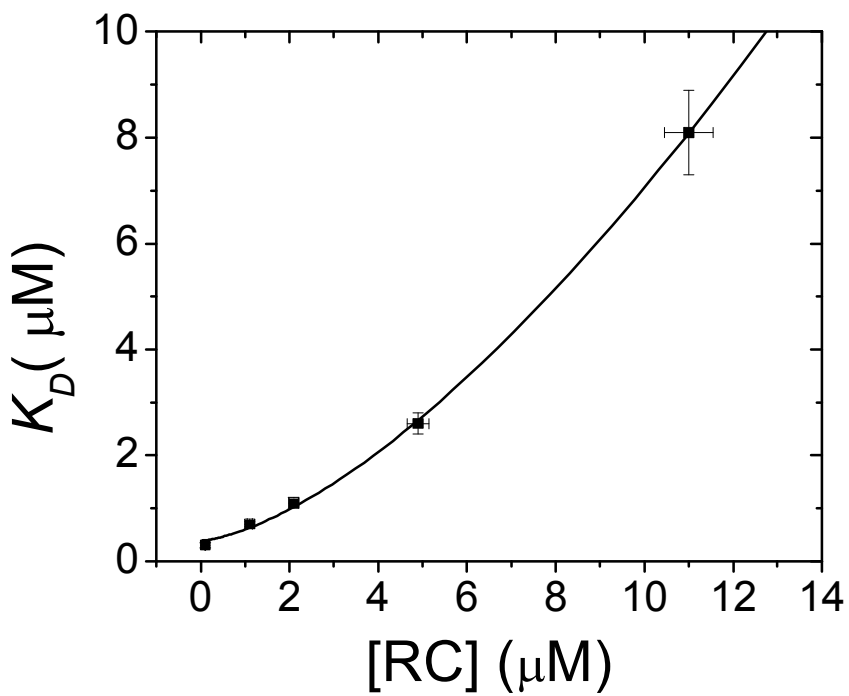

**Supplementary Figure S2.**  $K_D$  as function of RC concentration. The value of the cyt concentration needed for half saturation  $K_D$  increases as a function of the RC concentration. This result varied for different preparations of RCs and is attributed to an aggregation effect. (10 mM Hepes and 0.04%  $\beta$ -maltoside at pH 7.5)
